# Supplementary material for: Glucosinolates as Markers of the Origin and Harvesting Period for Discrimination of Bee Pollen by UPLC-MS/MS
Source: MDPI journal article supplement (doi:10.3390/foods11101446), 2022-05-17

## Supplementary Material

# Glucosinolates as Markers of the Origin and Harvesting Period for Discrimination of Bee Pollen by UPLC-MS/MS

Ana M. Ares <sup>1</sup>, Jesús A. Tapia <sup>1,2</sup>, Amelia V. González-Porto <sup>3</sup>, Mariano Higes <sup>3</sup>, Raquel Martín-Hernández <sup>3,4</sup> and José Bernal <sup>1,\*</sup>

<sup>1</sup> I. U. CINQUIMA, Analytical Chemistry Group (TESEA), Faculty of Sciences, University of Valladolid, 47011 Valladolid, Spain; ana.maria.ares@uva.es (A.M.A.); jesus.tapia@uva.es (J.A.T.)

<sup>2</sup> Department of Statistics and Operations Research, Faculty of Sciences, University of Valladolid, 47011 Valladolid, Spain

<sup>3</sup> Instituto Regional de Investigación y Desarrollo Agroalimentario y Forestal de Castilla La Mancha (IRIAF), Centro de Investigación Apícola y Agroambiental (CIAPA), Camino de San Martín, s/n, 19180 Marchamalo, Spain; avgonzalezp@jccm.es (A.V.G.-P.); mhiges@jccm.es (M.H.); rmhernandez@jccm.es (R.M.-H.).

<sup>4</sup> Instituto de Recursos Humanos para la Ciencia y la Tecnología (INCRECYT-EFS/EC-FSE), Fundación Parque Científico y Tecnológico de Castilla—La Mancha, 02006 Albacete, Spain

\* Correspondence: jose.bernal@uva.es; Tel.: +34-98-318-6347

**Table S1.** Colony of origin and harvesting period for each bee pollen sample.

| Colony  | Harvesting period |       |             |
|---------|-------------------|-------|-------------|
|         | April-May         | June  | July-August |
| C-FH-1  | FH-1              | -     | -           |
| C-FH-2  | FH-2              | -     | -           |
| C-FH-3  | -                 | FH-4  | FH-6        |
| C-FH-4  | FH-3              | -     | -           |
| C-FH-5  | -                 | FH-5  | FH-7        |
| C-MO-1  | MO-1              | MO-5  | MO-10       |
| C-MO-2  | MO-2              | MO-6  | -           |
| C-MO-3  | -                 | MO-7  | -           |
| C-MO-4  | MO-3              | MO-8  | MO-11       |
| C-MO-5  | MO-4              | MO-9  | MO-12       |
| C-PI-1  | PI-1              | PI-14 |             |
| C-PI-2  | PI-2              | PI-15 | PI-32       |
| C-PI-3  | PI-3              | PI-16 | PI-33       |
| C-PI-4  | PI-4              | PI-17 | PI-34       |
| C-PI-5  | -                 | PI-18 | PI-35       |
| C-PI-6  | -                 | PI-19 | PI-36       |
| C-PI-7  | PI-5              | PI-20 | -           |
| C-PI-8  | PI-6              | PI-21 | PI-37       |
| C-PI-9  | PI-7              | -     | -           |
| C-PI-10 | PI-8              | PI-22 | PI-38       |
| C-PI-11 | -                 | PI-23 | PI-39       |
| C-PI-12 | PI-9              | -     | -           |
| C-PI-13 | PI-10             | PI-24 | PI-40       |
| C-PI-14 | -                 | PI-25 | -           |
| C-PI-15 | PI-11             | PI-26 | PI-41       |
| C-PI-16 | -                 | PI-27 | PI-42       |
| C-PI-17 | -                 | PI-28 | PI-43       |
| C-PI-18 | PI-12             | PI-29 | PI-44       |
| C-PI-19 | PI-13             | PI-30 | PI-45       |
| C-PI-20 | -                 | PI-31 | -           |

**Table S1.** Continued.

| Colony | Harvesting period |      |             |
|--------|-------------------|------|-------------|
|        | April-May         | June | July-August |
| C-TN-1 | -                 | TN-1 | TN-6        |
| C-TN-2 | -                 | TN-2 | -           |
| C-TN-3 | -                 | TN-3 | TN-7        |
| C-TN-4 | -                 | TN-4 | -           |
| C-TN-5 | -                 | TN-5 | TN-8        |

**Table S2.** Instrument/devices, Sample treatment, UPLC elution program and MS/MS conditions.

|                             |                                                                                                                                                                                                                                                                                                                                                                                                                                                                                                                                                                                                                                                                                                                                                                                                                                                                                                                                                                                                                                                                    |
|-----------------------------|--------------------------------------------------------------------------------------------------------------------------------------------------------------------------------------------------------------------------------------------------------------------------------------------------------------------------------------------------------------------------------------------------------------------------------------------------------------------------------------------------------------------------------------------------------------------------------------------------------------------------------------------------------------------------------------------------------------------------------------------------------------------------------------------------------------------------------------------------------------------------------------------------------------------------------------------------------------------------------------------------------------------------------------------------------------------|
| <b>Instruments/devices</b>  | Syringe filters (17 mm, Nylon 0.45 $\mu\text{m}$ ) were purchased from Nalgene (Rochester, NY, USA), and ultrapure water was obtained from Millipore Milli-RO plus and Milli-Q systems (Bedford, MA, USA). An Eppendorf Centrifuge 5810R (Hamburg, Germany), an R-210/215 rotary evaporator 109 (Buchi, Flawil, Switzerland), Bond Elut NH2 (3 mL with 500 mg of sorbent) SPE cartridges from Agilent Technologies (Palo Alto, CA, USA), a 10-port Visiprep vacuum manifold (Supelco, St. Louis, MO, USA), a Moulinette chopper device from Moulinex (Paris, France), and a Vibromatic mechanical shaker and a drying oven both from J.P. Selecta S.A. (Barcelona, Spain) were used for the extractions.                                                                                                                                                                                                                                                                                                                                                           |
| <b>Sample treatment</b>     | The preparation of the samples was performed according to [23]. Briefly, 1 g of bee pollen sample and 10 mL of heated water (70 °C) were transferred to a centrifuge tube. The mixture was shaken for 10 min at maximum speed (960 oscillations per minute) in a Vibromatic and then centrifuged for 10 min at 4 °C and 10414g. The supernatant was collected and loaded onto a Bond Elut NH <sub>2</sub> SPE cartridge (previously conditioned with 5 mL of methanol and 5 mL of 1% acetic acid in water (v/v)) at about 1 mL/min by means of a suction system. The SPE cartridge was then washed with 5 mL of 5% acetic acid in methanol (v/v); the rinse was discarded, and, after 5 min of drying time, the analytes were eluted with 10 mL of freshly prepared 2% solution of ammonium hydroxide in methanol. The resulting solution was evaporated to dryness at 40 °C in a rotary evaporator; the dry residue was reconstituted with 1 mL of ultrapure water, filtered through a nylon 0.45- $\mu\text{m}$ filter, and injected into the UHPLC-QTOF system. |
| <b>UPLC elution program</b> | It was employed the same program as optimized in [18]. The mobile phase was composed of 0.1% (v/v) formic acid in water (solvent A) and 0.1% (v/v) formic acid in acetonitrile (solvent B) applied at a flow rate of 0.2 mL/ min in the following gradient mode: (i) 0.0–2.0 min (A:B, 100:0, v/v); (ii) 2.0–2.1 min (A:B, 90:10, v/v); (iii) 2.1–6.0 min (A:B, 90:10, v/v); (iv) 6.0–6.1 min (A:B, 50:50, v/v); (v) 6.1–7.5 min (A:B, 35:65, v/v); (vi) 7.5–7.6 min (A:B, 10:90, v/v); (vii) 7.6–9.5 min (A:B, 10:90, v/v); (viii) 9.5–11.0 min (A:B, 35:65, v/v); (ix) 11.0–12.5 min (A:B, 100:0, v/v); (x) 12.5–15.0 min (A:B, 100:0, v/v).                                                                                                                                                                                                                                                                                                                                                                                                                     |
| <b>MS/MS conditions</b>     | Capillary voltage, –2250 V; drying gas flow, 12 L/min; drying gas temperature, 220 °C; nebulizer pressure, 2 bar. GSLs were quantified by generating extracted ion chromatograms with the precursor ions; meanwhile the most relevant fragments for each precursor ion were also used to confirm the presence of each GSL. These MS/MS experiments were carried out by using an isolation width of 10 m/z and a collision energy of 40 eV.                                                                                                                                                                                                                                                                                                                                                                                                                                                                                                                                                                                                                         |

**Table S3.** Mean and confident interval (95%) values in µg/kg (dry weight) obtained for the GSLs in commercial (CO) samples. The GLSs not detected in those samples (GIB, PRO and GER) were not included.

| MUESTRA | SIN  | EPI    | GRA    | GNA     | ALY  | 4-OH    | GBN  | GTL     | GBC   | NAS    | 4-ME | NEO  |
|---------|------|--------|--------|---------|------|---------|------|---------|-------|--------|------|------|
| CO-1    | <LOD | 557±10 | 249±11 | 1216±70 | <LOD | 4193±53 | <LOQ | 286±3   | <LOQ  | 45±0   | <LOD | <LOD |
| CO-2    | <LOD | <LOQ   | <LOD   | 231±5   | <LOD | 639±141 | <LOQ | 228±17  | <LOD  | <LOQ   | <LOD | <LOD |
| CO-3    | <LOD | <LOD   | 69±5   | 60±10   | <LOD | 820±58  | <LOD | <LOD    | <LOD  | <LOD   | <LOD | <LOD |
| CO-4    | <LOD | 57±4   | <LOD   | 84±7    | <LOD | 1667±81 | <LOD | 158±5   | 419±0 | 623±30 | <LOQ | <LOD |
| CO-5    | <LOD | <LOD   | <LOD   | <LOQ    | <LOQ | 1159±35 | <LOQ | <LOD    | <LOD  | <LOD   | <LOD | <LOD |
| CO-6    | <LOD | <LOD   | 189±2  | 98±9    | <LOD | 899±63  | <LOD | <LOD    | <LOD  | <LOD   | <LOD | <LOD |
| CO-7    | <LOD | <LOD   | <LOD   | <LOQ    | <LOD | 1199±87 | <LOD | 23±1    | <LOD  | <LOD   | <LOD | <LOD |
| CO-8    | <LOD | <LOD   | <LOD   | <LOD    | <LOD | 702±47  | <LOD | <LOD    | <LOD  | <LOD   | <LOD | <LOQ |
| CO-9    | <LOD | <LOD   | <LOD   | 49±7    | <LOD | 953±103 | <LOD | <LOQ    | <LOD  | <LOD   | <LOQ | <LOD |
| CO-10   | <LOD | <LOD   | 170±2  | 304±0   | <LOD | 1216±61 | <LOD | 24±0    | <LOD  | <LOQ   | <LOQ | <LOD |
| CO-11   | 92±6 | 365±1  | <LOD   | 245±5   | <LOD | 1291±85 | <LOD | 1593±41 | 73±3  | 23±1   | <LOD | <LOD |

**Table S4.** Frequency and concentration range of each GSL from MO apiary.

| <b>GSL</b>  | <b>Frequency<sup>A</sup></b> | <b>Concentration Range*</b> |
|-------------|------------------------------|-----------------------------|
|             | <b>(%)</b>                   | <b>(µg/kg; Dry Weight)</b>  |
| <b>GIB</b>  | 0                            | <LOD                        |
| <b>PRO</b>  | 42                           | 299-4377                    |
| <b>SIN</b>  | 17                           | 1374-1851                   |
| <b>EPI</b>  | 25                           | <LOQ                        |
| <b>GRA</b>  | 33                           | 47-1036                     |
| <b>GNA</b>  | 58                           | 34-359                      |
| <b>ALY</b>  | 33                           | 266-3078                    |
| <b>4-OH</b> | 42                           | 195-3067                    |
| <b>GBN</b>  | 83                           | 52-6595                     |
| <b>GTL</b>  | 0                            | <LOD                        |
| <b>GER</b>  | 42                           | 36-102                      |
| <b>GBC</b>  | 33                           | 98-453                      |
| <b>NAS</b>  | 50                           | 50-4724                     |
| <b>4-ME</b> | 8                            | <LOQ                        |
| <b>NEO</b>  | 75                           | 51-4367                     |

<sup>A</sup>(number of samples in which a GLSs residue was detected/total number of samples ( $n = 12$ )) × 100. \*Concentrations over LOQ.

**Table S5.** Mean and confident interval (95%) values in µg/kg (dry weight) obtained for the GSLs in the samples from MO apiary. The GLSs not detected in those samples (GIB and GTL) were not included.

| SAMPLE | PRO     | SIN     | EPI  | GRA    | GNA    | ALY      | 4-OH   | GBN      | GER   | GBC    | NAS     | 4-ME | NEO      |
|--------|---------|---------|------|--------|--------|----------|--------|----------|-------|--------|---------|------|----------|
| MO-1   | 1266±4  | 1851±45 | <LOD | 270±11 | 77±6   | 1261±1   | 772±9  | 1968±30  | 37±1  | 98±5   | 859±30  | <LOD | 150±1    |
| MO-2   | 2832±57 | 1374±29 | <LOD | 341±1  | 359±6  | 3078±113 | 285±3  | 5266±23  | 102±0 | <LOD   | 4724±51 | <LOD | 959±18   |
| MO-3   | 4377±64 | <LOD    | <LOD | 1036±8 | 161±0  | 937±30   | 3067±5 | 2937±167 | 84±1  | 167±7  | 2324±63 | <LOD | 4367±107 |
| MO-4   | 299±11  | <LOD    | <LOQ | 47±0   | 34±1   | 266±5    | 491±22 | 580±14   | <LOQ  | <LOD   | 132±6   | <LOD | <LOD     |
| MO-5   | <LOQ    | <LOD    | <LOD | <LOD   | 50±1   | <LOD     | <LOD   | 555±33   | <LOD  | 453±14 | 997±9   | <LOD | 752±8    |
| MO-6   | <LOD    | <LOD    | <LOD | <LOD   | <LOD   | <LOD     | <LOD   | 91±2     | <LOD  | <LOD   | <LOD    | <LOD | 271±8    |
| MO-7   | <LOD    | <LOD    | <LOD | <LOD   | <LOD   | <LOD     | <LOD   | 181±6    | <LOD  | <LOD   | <LOD    | <LOD | 107±3    |
| MO-8   | <LOD    | <LOD    | <LOQ | <LOD   | 334±10 | <LOD     | 195±0  | 102±3    | <LOD  | 111±9  | 50±2    | <LOQ | 401±4    |
| MO-9   | <LOD    | <LOD    | <LOD | <LOD   | 110±2  | <LOD     | <LOD   | 6595±49  | <LOD  | <LOD   | <LOD    | <LOD | <LOD     |
| MO-10  | <LOD    | <LOD    | <LOD | <LOD   | <LOD   | <LOD     | <LOD   | <LOD     | 36±1  | <LOD   | <LOD    | <LOD | 51±0     |
| MO-11  | <LOD    | <LOD    | <LOQ | <LOD   | <LOD   | <LOD     | <LOD   | <LOD     | <LOD  | <LOD   | <LOD    | <LOD | 153±5    |
| MO-12  | <LOD    | <LOD    | <LOD | <LOD   | <LOD   | <LOD     | <LOD   | 52±3     | <LOD  | <LOD   | <LOD    | <LOD | <LOD     |

**Table S6.** Frequency and concentration range of each GSL from PI apiary.

| <b>GSL</b>  | <b>Frequency<sup>A</sup></b> | <b>Concentration Range *</b> |
|-------------|------------------------------|------------------------------|
|             | <b>(%)</b>                   | <b>(µg/kg; Dry Weight)</b>   |
| <b>GIB</b>  | 0                            | <LOD                         |
| <b>PRO</b>  | 36                           | 137-6690                     |
| <b>SIN</b>  | 44                           | 84-2721                      |
| <b>EPI</b>  | 11                           | 41-55                        |
| <b>GRA</b>  | 29                           | 58-1172                      |
| <b>GNA</b>  | 62                           | 27-1354                      |
| <b>ALY</b>  | 29                           | 143-7916                     |
| <b>4-OH</b> | 36                           | 105-1539                     |
| <b>GBN</b>  | 76                           | 31-8470                      |
| <b>GTL</b>  | 13                           | 22-76                        |
| <b>GER</b>  | 36                           | 34-126                       |
| <b>GBC</b>  | 27                           | 39-1467                      |
| <b>NAS</b>  | 44                           | 21-9936                      |
| <b>4-ME</b> | 33                           | 109-1664                     |
| <b>NEO</b>  | 60                           | 29-3928                      |

<sup>A</sup>(number of samples in which a GLSs residue was detected/total number of samples ( $n = 45$ ))  $\times 100$ ; \* Concentrations over LOQ.





|              |       |        |      |      |         |      |         |        |      |      |         |       |        |        |
|--------------|-------|--------|------|------|---------|------|---------|--------|------|------|---------|-------|--------|--------|
| <b>PI-18</b> | <LOD  | <LOD   | <LOQ | <LOD | 469±7   | <LOD | 218±15  | 76±6   | <LOD | <LOD | <LOD    | <LOD  | <LOQ   | 95±34  |
| <b>PI-19</b> | <LOD  | <LOD   | <LOD | <LOD | 92±2    | <LOD | 235±8   | 643±11 | <LOD | <LOD | <LOQ    | 61±2  | 203±1  | <LOD   |
| <b>PI-20</b> | <LOD  | <LOD   | <LOD | <LOD | <LOD    | <LOD | <LOD    | <LOQ   | <LOD | <LOD | <LOD    | <LOD  | <LOD   | 137±0  |
| <b>PI-21</b> | <LOD  | <LOD   | <LOD | <LOD | <LOD    | <LOD | <LOD    | <LOD   | <LOD | <LOD | <LOD    | <LOD  | <LOD   | <LOD   |
| <b>PI-22</b> | <LOD  | <LOD   | <LOD | <LOD | <LOD    | <LOD | <LOD    | 699±17 | <LOQ | 47±1 | <LOD    | <LOD  | <LOD   | <LOD   |
| <b>PI-23</b> | <LOD  | <LOD   | <LOD | <LOD | 295±5   | <LOD | <LOD    | 60±0   | <LOD | <LOD | <LOD    | <LOQ  | <LOD   | <LOD   |
| <b>PI-24</b> | <LOD  | <LOD   | <LOD | <LOD | <LOD    | <LOD | <LOD    | 54±0   | <LOD | <LOQ | <LOD    | <LOD  | <LOD   | <LOQ   |
| <b>PI-25</b> | <LOD  | <LOD   | <LOD | <LOD | <LOQ    | <LOD | <LOD    | <LOQ   | <LOD | <LOD | <LOD    | <LOD  | <LOQ   | <LOQ   |
| <b>PI-26</b> | <LOQ  | <LOD   | <LOD | <LOD | 62±3    | <LOD | 415±1   | 31±1   | <LOD | 36±1 | <LOD    | 49±3  | 165±4  | 133±1  |
| <b>PI-27</b> | 137±6 | <LOD   | <LOD | <LOD | 558±5   | <LOD | 1121±21 | 2732±1 | 76±4 | <LOD | <LOD    | <LOD  | 663±20 | <LOD   |
| <b>PI-28</b> | <LOD  | 706±22 | 55±3 | <LOD | 1354±50 | <LOD | <LOD    | 41±1   | <LOQ | <LOD | 207±7   | <LOD  | 1664±7 | <LOD   |
| <b>PI-29</b> | <LOD  | 292±6  | <LOD | <LOD | 90±0    | <LOD | <LOD    | 336±19 | <LOD | <LOD | <LOD    | <LOD  | <LOD   | 77±3   |
| <b>PI-30</b> | <LOD  | 590±6  | <LOD | <LOD | 400±12  | <LOD | 296±2   | 60±3   | <LOD | <LOD | 1467±14 | 448±8 | 109±7  | 187±6  |
| <b>PI-31</b> | <LOD  | <LOD   | <LOD | <LOD | 189±7   | <LOD | <LOD    | 364±15 | <LOD | <LOD | <LOD    | <LOD  | <LOD   | 54±5   |
| <b>PI-32</b> | <LOD  | <LOD   | <LOD | <LOD | <LOD    | <LOD | <LOD    | 106±4  | <LOD | <LOD | <LOD    | <LOD  | <LOQ   | <LOD   |
| <b>PI-33</b> | <LOD  | <LOD   | <LOD | <LOD | <LOD    | <LOD | <LOD    | 466±28 | 22±4 | <LOD | <LOD    | <LOD  | 109±1  | <LOD   |
| <b>PI-34</b> | <LOD  | <LOD   | <LOD | <LOD | <LOD    | <LOD | <LOD    | <LOD   | <LOD | <LOD | <LOD    | <LOD  | <LOD   | 622±8  |
| <b>PI-35</b> | <LOD  | <LOD   | <LOD | <LOD | <LOD    | <LOD | <LOD    | <LOD   | <LOD | <LOD | <LOD    | <LOD  | <LOD   | 974±34 |
| <b>PI-36</b> | <LOD  | 121±3  | <LOD | <LOD | 160±4   | <LOD | <LOD    | <LOD   | <LOD | <LOD | <LOD    | 45±0  | <LOD   | 685±3  |

|              |      |      |      |      |      |      |         |       |      |      |      |      |      |         |
|--------------|------|------|------|------|------|------|---------|-------|------|------|------|------|------|---------|
| <b>PI-37</b> | <LOD    | <LOQ  | <LOD | <LOQ | <LOD | 21±0 | <LOD | <LOD    |
| <b>PI-38</b> | <LOD    | <LOD  | <LOD | <LOD | <LOD | <LOD | <LOD | 29±0    |
| <b>PI-39</b> | <LOD    | <LOD  | <LOD | 34±6 | <LOD | <LOD | <LOD | <LOD    |
| <b>PI-40</b> | <LOD    | <LOQ  | <LOD | <LOD | <LOD | <LOD | <LOD | 29±1    |
| <b>PI-41</b> | <LOD | <LOD | <LOD | <LOD | <LOD | <LOD | 143±2   | <LOD  | <LOD | <LOD | <LOD | <LOD | <LOD | 1272±44 |
| <b>PI-42</b> | <LOD | <LOD | <LOD | <LOD | <LOD | <LOD | 891±5   | <LOQ  | <LOD | <LOD | 63±1 | <LOD | <LOD | <LOD    |
| <b>PI-43</b> | <LOD | <LOD | <LOD | <LOD | <LOD | <LOD | 1539±24 | 117±6 | <LOD | <LOD | <LOD | <LOD | <LOD | 120±3   |
| <b>PI-44</b> | <LOD | <LOD | <LOD | <LOD | <LOD | <LOD | 1182±22 | <LOD  | <LOD | <LOD | <LOD | <LOD | <LOD | 567±2   |
| <b>PI-45</b> | <LOD    | <LOQ  | <LOD | <LOD | <LOD | <LOD | <LOD | 70±1    |

**Table S8.** Frequency and concentration range of each GSL from TN apiary.

| <b>GSL</b>  | <b>Frequency<sup>A</sup></b> | <b>Concentration Range*</b> |
|-------------|------------------------------|-----------------------------|
|             | <b>(%)</b>                   | <b>(µg/kg; Dry Weight)</b>  |
| <b>GIB</b>  | 0                            | <LOD                        |
| <b>PRO</b>  | 0                            | <LOD                        |
| <b>SIN</b>  | 13                           | <LOQ                        |
| <b>EPI</b>  | 25                           | <LOQ                        |
| <b>GRA</b>  | 0                            | <LOD                        |
| <b>GNA</b>  | 25                           | 162-411                     |
| <b>ALY</b>  | 13                           | <LOQ                        |
| <b>4-OH</b> | 0                            | <LOD                        |
| <b>GBN</b>  | 38                           | 79-221                      |
| <b>GTL</b>  | 13                           | <LOQ                        |
| <b>GER</b>  | 13                           | 152                         |
| <b>GBC</b>  | 25                           | 155-547                     |
| <b>NAS</b>  | 25                           | 76-91                       |
| <b>4-ME</b> | 38                           | 346                         |
| <b>NEO</b>  | 38                           | 36-48                       |

<sup>A</sup>(number of samples in which a GLSs residue was detected/total number of samples ( $n = 8$ ))  $\times$  100. \*Concentrations over LOQ.

**Table S9.** Mean and confident interval (95%) values in µg/kg (dry weight) obtained for the GSL in the samples from TN apiary. The GSLs not detected in those samples (GIB, PRO, GRA and 4-OH) were not included.

[illegible]

**Table S10.** Frequency and concentration range of each GSL from FH apiary.

| <b>GSL</b>  | <b>Frequency<sup>A</sup></b> | <b>Concentration Range*</b> |
|-------------|------------------------------|-----------------------------|
|             | <b>(%)</b>                   | <b>(µg/kg; Dry Weight)</b>  |
| <b>GIB</b>  | 0                            | <LOD                        |
| <b>PRO</b>  | 43                           | 130-1361                    |
| <b>SIN</b>  | 14                           | 478                         |
| <b>EPI</b>  | 43                           | <LOQ                        |
| <b>GRA</b>  | 29                           | 184                         |
| <b>GNA</b>  | 43                           | 30-131                      |
| <b>ALY</b>  | 43                           | 157-1018                    |
| <b>4-OH</b> | 29                           | 166-3370                    |
| <b>GBN</b>  | 43                           | 548-1200                    |
| <b>GTL</b>  | 0                            | <LOD                        |
| <b>GER</b>  | 14                           | <LOQ                        |
| <b>GBC</b>  | 14                           | 194                         |
| <b>NAS</b>  | 86                           | 99-1497                     |
| <b>4-ME</b> | 0                            | <LOD                        |
| <b>NEO</b>  | 71                           | 35-5562                     |

<sup>A</sup>(number of samples in which a GLSs residue was detected/total number of samples ( $n = 7$ ))  $\times$  100. \*Concentrations over LOQ.

**Table S11.** Mean and confident interval (95%) values in µg/kg (dry weight) obtained for the GSLs in the samples from FH apiary. The GSLs not detected in those samples (GIB, 4-ME and GTL) were not included.

[illegible]

**Table S12.** Weights of the first three canonical variables for the 83 samples.

| Variable | Can1         | Can2         | Can3         |
|----------|--------------|--------------|--------------|
| PRO_1    | -0.029047313 | 0.016096285  | 0.049168694  |
| PRO_2    | 0.002967934  | 0.153952971  | 0.008411896  |
| PRO_3    | 0.021118629  | -0.171696190 | -0.061440690 |
| SIN_1    | -0.053151810 | 0.022857796  | 0.029459475  |
| SIN_2    | 0.015057546  | -0.010756261 | 0.131756633  |
| SIN_3    | 0.040197830  | -0.005046324 | -0.162544499 |
| EPI_1    | -0.582930260 | 0.675436703  | -1.306376552 |
| EPI_2    | 0.166944122  | 0.733024926  | -0.927492934 |
| EPI_3    | 0.403538184  | -1.405024433 | 2.229260254  |
| GRA_1    | -0.225422837 | -0.337479147 | -0.120504978 |
| GRA_2    | -0.468469099 | -0.467611206 | -0.144537582 |
| GRA_3    | 0.707437189  | 0.804334119  | 0.261912824  |
| GNA_1    | -0.029831969 | 0.373605104  | -0.062751251 |
| GNA_2    | -0.092247455 | 0.436590348  | -0.061735658 |
| GNA_3    | 0.124155346  | -0.809705096 | 0.125962444  |
| ALY_1    | 0.094260396  | 0.023241338  | -0.136860563 |
| ALY_2    | 0.092984425  | 0.080691769  | -0.275359760 |
| ALY_3    | -0.187400719 | -0.103817812 | 0.413809837  |
| 4_OH_1   | -0.014177858 | 0.002349057  | 0.006244149  |
| 4_OH_2   | -0.036351288 | 0.000981165  | 0.008906508  |
| 4_OH_3   | 0.053275145  | -0.002501512 | -0.014815507 |
| GBN_1    | 0.022578965  | -0.072821570 | 0.096316975  |
| GBN_2    | 0.004767189  | -0.011002234 | 0.098473225  |
| GBN_3    | -0.027374258 | 0.082880002  | -0.194274574 |
| GTL_1    | -0.372029112 | -0.298840960 | 0.153577452  |



---

|               |              |              |              |
|---------------|--------------|--------------|--------------|
| <b>GTL_2</b>  | -0.102526182 | -0.991561539 | 0.303585402  |
| <b>GTL_3</b>  | 0.490818188  | 1.279180896  | -0.455472084 |
| <b>GER_1</b>  | -0.197759955 | 0.296168033  | 0.573327514  |
| <b>GER_2</b>  | -0.097211863 | 0.780934963  | 0.451198252  |
| <b>GER_3</b>  | 0.292157883  | -1.083347830 | -1.012017517 |
| <b>GBC_1</b>  | 0.038230513  | -0.066631118 | 0.029027182  |
| <b>GBC_2</b>  | 0.146430492  | -0.273044898 | 0.114322420  |
| <b>GBC_3</b>  | -0.185790368 | 0.336828620  | -0.141800512 |
| <b>NAS_1</b>  | -0.013098735 | -0.011966354 | -0.025735045 |
| <b>NAS_2</b>  | 0.013444044  | 0.014822097  | 0.029096033  |
| <b>NAS_3</b>  | 0.001481710  | -0.002270233 | -0.004064490 |
| <b>4_ME_1</b> | 0.226573498  | -0.496440964 | -0.076891914 |
| <b>4_ME_2</b> | 0.025263631  | -0.109729842 | -0.224630635 |
| <b>4_ME_3</b> | -0.255027123 | 0.608698160  | 0.304750980  |
| <b>NEO_1</b>  | -0.013765178 | -0.085644742 | 0.053401247  |
| <b>NEO_2</b>  | -0.031917217 | -0.122330458 | 0.068038468  |
| <b>NEO_3</b>  | 0.043939100  | 0.207736089  | -0.120487023 |

---

**Table S13.** Mean values of the canonical variables 1 and 2 for the 83 samples.

| Group | Nº<br>Observations | Variable | Mean       |
|-------|--------------------|----------|------------|
| FH    | 7                  | Can1     | -1.0427355 |
|       |                    | Can2     | -1.5899360 |
|       |                    | Can 3    | -2.3746905 |
| MO    | 12                 | Can1     | -1.2987433 |
|       |                    | Can2     | -2.3660896 |
|       |                    | Can 3    | 0.8481109  |
| PI    | 45                 | Can1     | -0.6077352 |
|       |                    | Can2     | 1.0672124  |
|       |                    | Can 3    | 0.0129179  |
| TN    | 8                  | Can1     | -0.9423825 |
|       |                    | Can2     | -0.5117047 |
|       |                    | Can 3    | 0.6974254  |
| CO    | 11                 | Can1     | 5.2519283  |
|       |                    | Can2     | -0.4007541 |
|       |                    | Can 3    | 0.0258906  |

**Table S14.** Number of observations and percentage classified in each group using canonical discriminant analysis.

| Origin       | FH    | MO    | PI    | TN     | CO     | Total  |
|--------------|-------|-------|-------|--------|--------|--------|
| <b>FH</b>    | 4     | 1     | 0     | 2      | 0      | 7      |
| %            | 57.14 | 14.29 | 0.00  | 28.57  | 0.00   | 100.00 |
| <b>MO</b>    | 0     | 11    | 0     | 1      | 0      | 12     |
| %            | 0.00  | 91.67 | 0.00  | 8.33   | 0.00   | 100.00 |
| <b>PI</b>    | 0     | 0     | 32    | 10     | 3      | 45     |
| %            | 0.00  | 0.00  | 71.11 | 22.22  | 6.67   | 100.00 |
| <b>TN</b>    | 0     | 0     | 0     | 8      | 0      | 8      |
| %            | 0.00  | 0.00  | 0.00  | 100.00 | 0.00   | 100.00 |
| <b>CO</b>    | 0     | 0     | 0     | 0      | 11     | 11     |
| %            | 0.00  | 0.00  | 0.00  | 0.00   | 100.00 | 100.00 |
| <b>Total</b> | 4     | 12    | 32    | 21     | 14     | 83     |
|              | 4.82  | 14.46 | 38.55 | 25.30  | 16.87  | 100.00 |

**Table S15.** Weights of the first three canonical variables for the 72 samples (origin).

| Variable | Can1         | Can2         | Can3         |
|----------|--------------|--------------|--------------|
| PRO_1    | -0.078745945 | -0.116207143 | 0.121683634  |
| PRO_2    | 0.127590164  | -0.154520816 | 0.076472635  |
| PRO_3    | -0.049191393 | 0.275374820  | -0.197026038 |
| SIN_1    | -0.111818356 | -0.008649097 | 0.072056303  |
| SIN_2    | -0.108485741 | -0.201103259 | 0.026351561  |
| SIN_3    | 0.226762108  | 0.209684686  | -0.101693079 |
| EPI_1    | 1.789579869  | -0.813021601 | -1.912587191 |
| EPI_2    | 3.270330127  | 0.733363327  | 0.019271430  |
| EPI_3    | -5.082371063 | 0.068897542  | 1.823497872  |
| GRA_1    | 1.208119911  | 0.555488170  | -0.094246958 |
| GRA_2    | 0.169633144  | 1.133910857  | 0.510230481  |
| GRA_3    | -1.403109611 | -1.699194905 | -0.424533089 |
| GNA_1    | 0.675320477  | 0.742149277  | 0.020598370  |
| GNA_2    | 0.615895505  | 0.322197264  | -0.128720350 |
| GNA_3    | -1.285343203 | -1.063587445 | 0.113914054  |
| ALY_1    | 0.029711270  | 0.028684922  | -0.180132726 |
| ALY_2    | 0.031536749  | 0.089802646  | -0.267282265 |
| ALY_3    | -0.057128787 | -0.119667751 | 0.447992926  |
| 4_OH_1   | 0.007623856  | 0.047557136  | 0.059431932  |
| 4_OH_2   | -0.040703973 | -0.021372745 | 0.029864601  |
| 4_OH_3   | 0.034010811  | -0.026943455 | -0.089527495 |
| GBN_1    | -0.171788584 | -0.086374718 | 0.013865749  |
| GBN_2    | -0.074148065 | -0.057677099 | 0.014472501  |
| GBN_3    | 0.244638563  | 0.144318114  | -0.027903843 |
| GTL_1    | 3.435596513  | 4.811908653  | -0.166599369 |
| GTL_2    | 0.082058717  | 1.344653238  | -0.168433114 |
| GTL_3    | -3.507478458 | -6.085263345 | 0.298816621  |

|               |              |              |              |
|---------------|--------------|--------------|--------------|
| <b>GER_1</b>  | 0.481744379  | -1.197332050 | 0.902250394  |
| <b>GER_2</b>  | 0.925328929  | -1.006774676 | 0.675306355  |
| <b>GER_3</b>  | -1.417511691 | 2.180542205  | -1.566404109 |
| <b>GBC_1</b>  | -0.102153412 | 0.003737694  | 0.022095882  |
| <b>GBC_2</b>  | -0.512276796 | -0.295470632 | 0.030253232  |
| <b>GBC_3</b>  | 0.609992802  | 0.292287398  | -0.050589254 |
| <b>NAS_1</b>  | -0.004408643 | 0.008856185  | -0.006644458 |
| <b>NAS_2</b>  | 0.005692356  | -0.012198799 | 0.012125342  |
| <b>NAS_3</b>  | -0.000927427 | 0.004224894  | -0.007445508 |
| <b>4_ME_1</b> | -0.453362143 | 0.248120204  | -0.168325744 |
| <b>4_ME_2</b> | 0.444436857  | 0.999971883  | -0.102166986 |
| <b>4_ME_3</b> | 0.008175248  | -1.259628513 | 0.270328426  |
| <b>NEO_1</b>  | -0.129622269 | -0.068110374 | 0.109881240  |
| <b>NEO_2</b>  | -0.135379020 | -0.040639459 | 0.108501425  |
| <b>NEO_3</b>  | 0.265728523  | 0.109593534  | -0.217093249 |

**Table S16.** Mean values of the canonical variables 1 and 3 for the 72 samples (apiary of origin).

| Group | Nº<br>Observations | Variable | Mean       |
|-------|--------------------|----------|------------|
| FH    | 7                  | Can1     | -1.5801771 |
|       |                    | Can2     | 0.9612291  |
|       |                    | Can 3    | -2.2140864 |
| MO    | 12                 | Can1     | -2.5838455 |
|       |                    | Can2     | 0.7672015  |
|       |                    | Can 3    | 1.0680189  |
| PI    | 45                 | Can1     | 1.2116470  |
|       |                    | Can2     | 0.0771155  |
|       |                    | Can 3    | 0.1027449  |
| TN    | 8                  | Can1     | -1.5570911 |
|       |                    | Can2     | -2.4256523 |
|       |                    | Can 3    | -0.2426428 |

**Table S17.** Number of observations and percentage classified in each apiary using canonical discriminant analysis.

| <b>Origin</b> | <b>FH</b> | <b>MO</b> | <b>PI</b> | <b>TN</b> | <b>Total</b> |
|---------------|-----------|-----------|-----------|-----------|--------------|
| <b>FH</b>     | 5         | 0         | 0         | 2         | 7            |
| <b>%</b>      | 71.43     | 0.00      | 0.00      | 28.57     | 100.00       |
| <b>MO</b>     | 0         | 10        | 0         | 2         | 12           |
| <b>%</b>      | 0.00      | 83.33     | 0.00      | 16.67     | 100.00       |
| <b>PI</b>     | 3         | 0         | 39        | 3         | 45           |
| <b>%</b>      | 6.67      | 0.00      | 86.67     | 6.67      | 100.00       |
| <b>TN</b>     | 0         | 0         | 0         | 8         | 8            |
| <b>%</b>      | 0.00      | 0.00      | 0.00      | 100.00    | 100.00       |
| <b>Total</b>  | 8         | 10        | 39        | 15        | 72           |
|               | 11.11     | 13.89     | 54.17     | 20.83     | 100.00       |

**Table S18.** Weights of the first two canonical variables for the 72 samples (harvesting periods).

| Variable | Can1         | Can2         |
|----------|--------------|--------------|
| PRO_1    | -0.080201118 | 0.042524563  |
| PRO_2    | 0.055348265  | 0.146737661  |
| PRO_3    | 0.022739485  | -0.176307024 |
| SIN_1    | -0.050814301 | 0.110659318  |
| SIN_2    | -0.216326233 | 0.056173528  |
| SIN_3    | 0.267766485  | -0.165866447 |
| EPI_1    | 4.137764804  | 1.231739870  |
| EPI_2    | -0.595786849 | -0.501886895 |
| EPI_3    | -3.267159906 | -0.704273036 |
| GRA_1    | -1.228041451 | -0.284852906 |
| GRA_2    | 0.696769188  | 0.233886798  |
| GRA_3    | 0.538952012  | -0.007411957 |
| GNA_1    | 0.525335229  | -0.059027491 |
| GNA_2    | 0.841944528  | 0.250136764  |
| GNA_3    | -1.385212738 | -0.185903536 |
| ALY_1    | 0.063254618  | -0.037751351 |
| ALY_2    | -0.033033065 | 0.047784825  |
| ALY_3    | -0.020271029 | -0.015473271 |
| _4_OH_1  | 0.105084115  | -0.011156037 |
| _4_OH_2  | 0.020359864  | 0.000641472  |
| _4_OH_3  | -0.127581926 | 0.008882004  |
| GBN_1    | -0.062075012 | -0.040828744 |
| GBN_2    | 0.047185500  | 0.038062074  |
| GBN_3    | 0.014457572  | 0.002441351  |
| GTL_1    | -0.176279802 | 2.354322840  |
| GTL_2    | 0.171249741  | 1.358018936  |
| GTL_3    | 0.199997669  | -3.508700398 |



---

|         |              |              |
|---------|--------------|--------------|
| GER_1   | -2.456659926 | -2.933516584 |
| GER_2   | -1.796419403 | -2.797354996 |
| GER_3   | 4.213306275  | 5.745429203  |
| GBC_1   | -0.140745700 | -0.100315260 |
| GBC_2   | -0.587321053 | -0.350532939 |
| GBC_3   | 0.732428202  | 0.452024171  |
| NAS_1   | -0.016210049 | 0.001481072  |
| NAS_2   | 0.025092686  | -0.003238585 |
| NAS_3   | -0.010932472 | 0.002922961  |
| _4_ME_1 | -0.225535705 | 0.126673852  |
| _4_ME_2 | -0.192901959 | -0.301996518 |
| _4_ME_3 | 0.416311984  | 0.173859513  |
| NEO_1   | -0.022736015 | -0.004774465 |
| NEO_2   | 0.026057150  | 0.029671365  |
| NEO_3   | -0.001712700 | -0.025406925 |

---

**Table S19.** Mean values of the canonical variables 1 and 2 for the 72 samples (harvesting periods).

| Origin      | Nº<br>Observations | Variable | Mean       |
|-------------|--------------------|----------|------------|
| April-May   | 20                 | Can1     | 6.2380705  |
|             |                    | Can2     | 0.0144656  |
| June        | 22                 | Can1     | -2.4444886 |
|             |                    | Can2     | -1.3811192 |
| July-August | 30                 | Can1     | -2.5319706 |
|             |                    | Can2     | 0.9901445  |

**Table S20.** Number of observations and percentage classified in each group (harvesting period) using canonical discriminant analysis.

| Origin      | April-May | June  | July-August | Total  |
|-------------|-----------|-------|-------------|--------|
| April-May   | 20        | 0     | 0           | 20     |
| %           | 100.00    | 0.00  | 0.00        | 100.00 |
| June        | 0         | 21    | 1           | 22     |
| %           | 0.00      | 95.45 | 4.55        | 100.00 |
| July-August | 0         | 10    | 20          | 30     |
| %           | 0.00      | 34.48 | 66,67       | 100.00 |
| Total       | 20        | 31    | 21          | 72     |
|             | 27.78     | 43.06 | 29,17       | 100.00 |

**Figure S1.** UPLC-MS/MS extracted ion chromatogram obtained in positive mode using the quantification ions (see Table 1) from PI-11 bee pollen sample in which eleven GSLs were detected: PRO (1); SIN (2); GRA (3); GNA (4); ALY (5); GBN (6); GER (17); GBC (8); NAS (9); 4-Me (10); NEO (11). The UPLC-MS/MS conditions are summarized in Subsection 2.4 and Table 1.

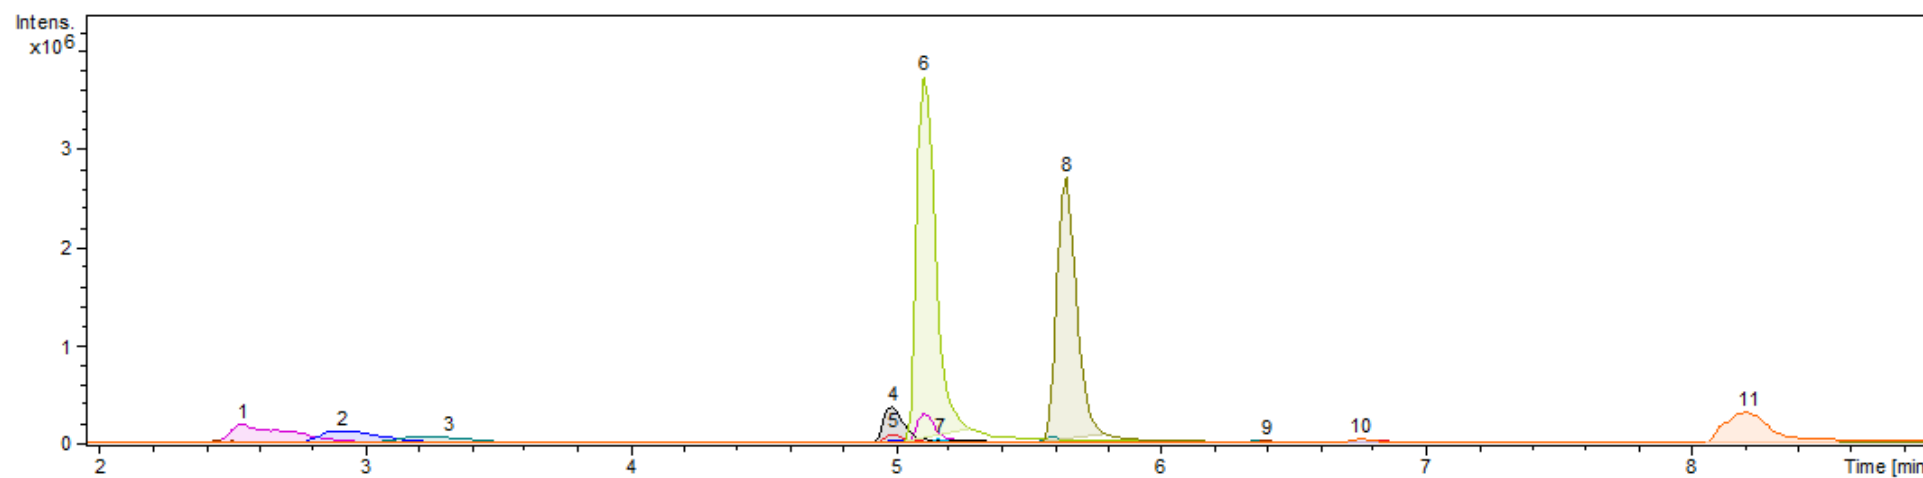

**Figure S2.** Representation of individual bee pollen samples (see Table 2) from the apiaries (FH, 1; MO, 2; PI, 3; TN, 4) and local markets (5) as function of the first two canonical variables.

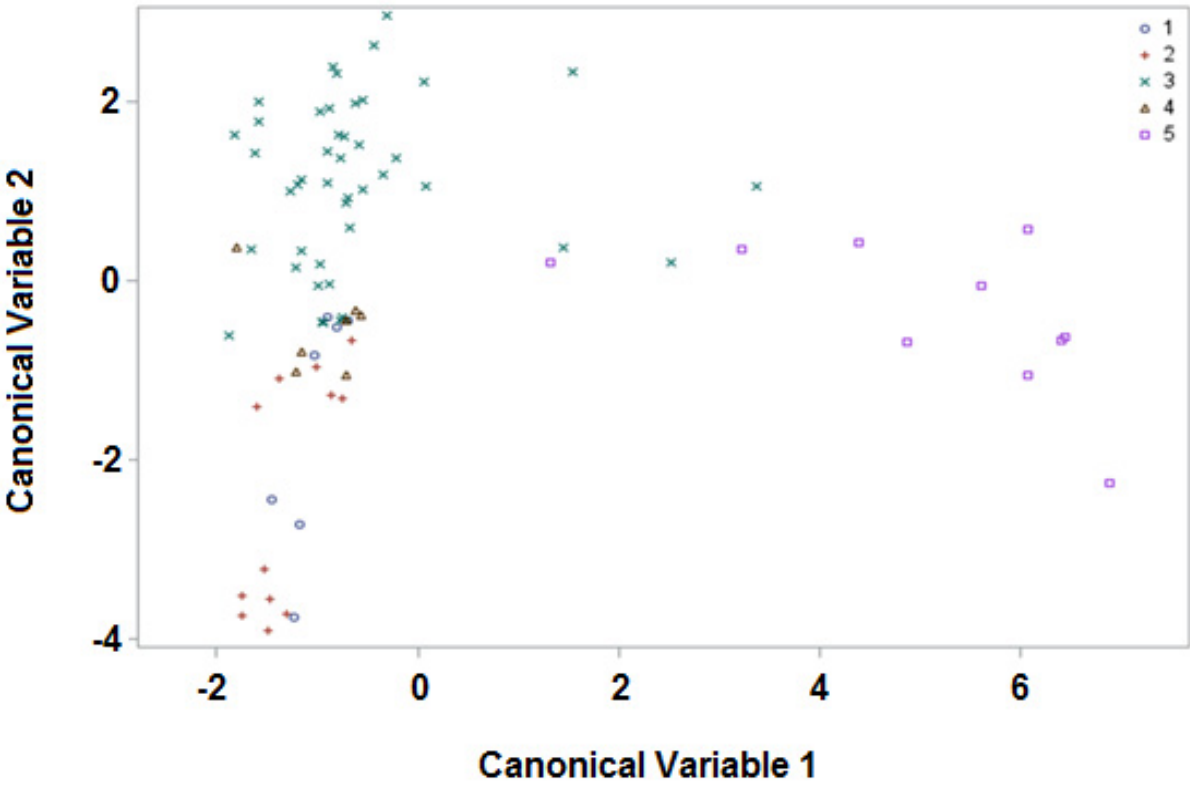

**Figure S3.** Representation of individual bee pollen samples (see Table 2) from the apiaries (FH, 1; MO, 2; PI, 3; TN, 4) as function of canonical variables 1 and 3.

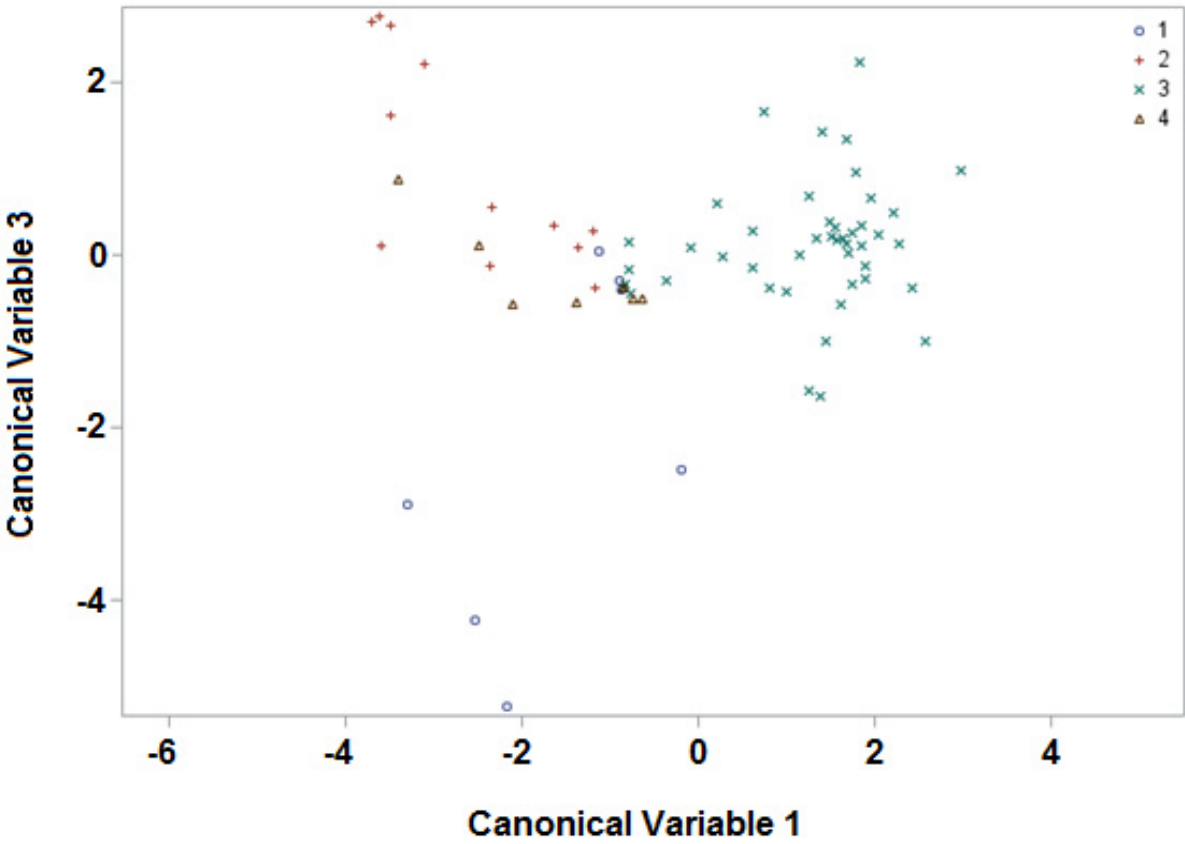

**Figure S4.** Representation of individual bee pollen samples (see Table 2) from the different harvesting periods (April-May, 1; June, 2; July-August, 3) as function of the first two canonical variables.

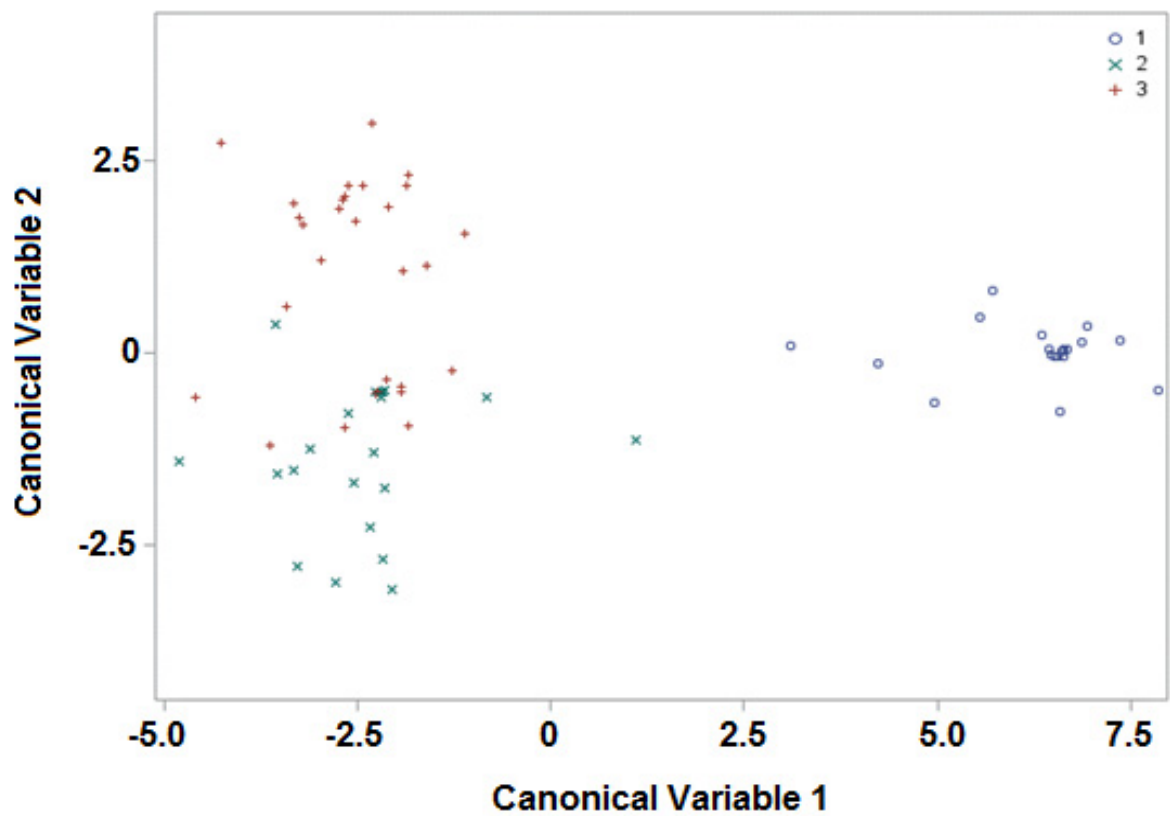

Supplement: s1 [file s1]
